# Supplementary material for: Dorsolateral Prefrontal Cortex Activity Predicts Responsiveness to Cognitive–Behavioral Therapy in Schizophrenia
Source: PubMed Central journal article supplement (PMC2734077; doi:10.1016/j.biopsych.2009.04.036), 2009-09-15
Supplement: mmc1.pdf [file mmc1.pdf]

**Supplemental Table 1.** Brain areas showing activation increases and decreases in association with individual task conditions (height threshold  $p < .001$ ) in patients (CBT+TAU) and healthy participants.

| Patients                                                       | BA     | Cluster size (voxels) | Side | MNI Coordinates |     |     | Voxel T value | Cluster $p$ (corrected) |
|----------------------------------------------------------------|--------|-----------------------|------|-----------------|-----|-----|---------------|-------------------------|
|                                                                |        |                       |      | X               | Y   | Z   |               |                         |
| <b>0-back &gt; Rest</b>                                        |        |                       |      |                 |     |     |               |                         |
| Middle frontal gyrus                                           | 6      | 3658                  | L    | -34             | -10 | 60  | 11.22         | <.001                   |
| Post-central gyrus                                             | 1/2    |                       | L    | -40             | -36 | 54  | 10.57         |                         |
| Pre-central gyrus                                              | 4      |                       | L    | -42             | -18 | 60  | 9.43          |                         |
| Medial frontal gyrus                                           | 6      | 609                   | R    | 2               | 0   | 58  | 8.61          | .001                    |
| AC                                                             | 32     |                       | R    | 6               | 6   | 48  | 6.43          |                         |
| Medial frontal gyrus                                           | 6      |                       | n/a  | 0               | -8  | 60  | 5.80          |                         |
| Post-central gyrus                                             | 2/4/43 | 281                   | L    | -58             | -22 | 18  | 7.62          | .036                    |
| <b>1-back &gt; Rest</b>                                        |        |                       |      |                 |     |     |               |                         |
| Pre-central gyrus                                              | 4      | 6398                  | L    | -42             | -20 | 58  | 10.86         | <.001                   |
| Medial frontal gyrus/AC                                        | 6/32   |                       | L    | -2              | 6   | 56  | 10.12         |                         |
| Inferior parietal lobe                                         | 40     |                       | L    | -38             | -38 | 56  | 9.81          |                         |
| Precuneus                                                      | 7      | 921                   | R    | 12              | -68 | 52  | 6.85          | <.001                   |
| Inferior parietal lobe                                         | 40     |                       | R    | 46              | -42 | 60  | 5.90          |                         |
| Superior parietal lobe                                         | 7      |                       | R    | 36              | -62 | 52  | 4.32          |                         |
| Middle temporal gyrus                                          | 21     | 268                   | R    | 60              | -62 | 0   | 6.66          | .044                    |
| Inferior temporal gyrus                                        | 37     |                       | R    | 52              | -74 | 2   | 4.63          |                         |
| Superior-middle frontal gyrus                                  | 6      | 361                   | R    | 32              | -6  | 58  | 6.65          | .015                    |
|                                                                | 6      |                       | R    | 42              | 0   | 54  | 6.21          |                         |
| <b>2-back &gt; Rest</b>                                        |        |                       |      |                 |     |     |               |                         |
| Inferior parietal cortex                                       | 40     | 9671                  | L    | -44             | -44 | 50  | 12.25         | <.001                   |
| Medial frontal gyrus/AC                                        | 6      |                       | L    | -4              | 8   | 56  | 12.10         |                         |
| Superior parietal lobe                                         | 7      |                       | L    | -12             | -68 | 56  | 11.98         |                         |
| Superior-middle frontal gyrus (extends to sensorimotor cortex) | 6      | 1996                  | R    | 42              | 0   | 52  | 8.32          | <.001                   |
|                                                                | 6      |                       | R    | 30              | -2  | 58  | 6.72          |                         |
| Middle frontal gyrus (DLPFC)                                   | 46     |                       | R    | 42              | 38  | 28  | 6.58          |                         |
| Cerebellum                                                     | n/a    | 334                   | L    | -36             | -52 | -36 | 7.76          | .019                    |
|                                                                |        |                       | L    | -28             | -60 | -32 | 5.75          |                         |
|                                                                |        | 316                   | R    | 32              | -54 | -30 | 7.43          | .023                    |
|                                                                |        |                       | R    | 4               | -66 | -18 | 3.92          |                         |
| Middle temporal gyrus                                          | 21     | 577                   | R    | 58              | -64 | 0   | 5.95          | .001                    |
|                                                                | 37     |                       | R    | 50              | -68 | 2   | 5.72          |                         |
| Inferior temporal gyrus                                        | 37     |                       | R    | 50              | -58 | -14 | 5.67          |                         |
| Middle frontal gyrus (DLPFC)                                   | 46     | 289                   | L    | -40             | 50  | 20  | 5.51          | .032                    |
|                                                                | 10/46  |                       | L    | -34             | 60  | 10  | 4.63          |                         |
| Middle frontal gyrus                                           | 10     |                       | L    | -40             | 56  | 2   | 4.54          |                         |
| <b>1-back &gt; 0-back</b>                                      |        |                       |      |                 |     |     |               |                         |
| Middle frontal gyrus (DLPFC)                                   | 46     | 686                   | L    | -44             | 32  | 26  | 7.77          | <.001                   |
|                                                                | 46     |                       | L    | -36             | 44  | 22  | 6.45          |                         |
|                                                                | 9      |                       | L    | -52             | 26  | 34  | 5.54          |                         |
| Superior-middle frontal gyrus                                  | 6      | 599                   | L    | -26             | 4   | 56  | 7.27          | .001                    |
|                                                                | 6/9    |                       | L    | -46             | 4   | 46  | 6.80          |                         |
|                                                                | 6      |                       | L    | -36             | -4  | 52  | 6.03          |                         |

|                                                           |       |       |     |     |     |     |       |       |
|-----------------------------------------------------------|-------|-------|-----|-----|-----|-----|-------|-------|
| Superior-middle frontal gyrus<br>(includes DLPFC)         | 6     | 1079  | R   | 38  | 0   | 54  | 7.14  | <.001 |
|                                                           | 8     |       | R   | 30  | 6   | 52  | 5.49  |       |
|                                                           | 10/46 |       | R   | 42  | 48  | 22  | 5.33  |       |
| Occipital gyrus                                           | 19    | 2102  | L   | -26 | -86 | 30  | 6.39  | <.001 |
| Precuneus                                                 | 7     |       | L   | -8  | -66 | 54  | 6.17  |       |
| Superior parietal lobule                                  | 7     |       | R   | 16  | -76 | 58  | 6.08  |       |
| <b>2-back &gt; 0-back</b>                                 |       |       |     |     |     |     |       |       |
| Precuneus                                                 | 7     | 4540  | R   | 8   | -62 | 56  | 9.69  | <.001 |
| Inferior parietal lobe                                    | 40    |       | R   | 50  | -40 | 48  | 9.19  |       |
| Precuneus                                                 | 7     |       | L   | -10 | -66 | 56  | 9.00  |       |
| AC                                                        | 32/6  | 3442  | R   | 4   | 20  | 52  | 8.45  | <.001 |
| Middle frontal gyrus<br>(includes DLPFC)                  | 9     |       | R   | 52  | 14  | 32  | 8.30  |       |
|                                                           | 46/10 |       | R   | 38  | 52  | 20  | 7.32  |       |
| Middle frontal gyrus<br>(includes DLPFC)                  | 9/46  | 1987  | L   | -44 | 32  | 30  | 8.21  | <.001 |
|                                                           | 10    |       | L   | -34 | 60  | 6   | 7.23  |       |
|                                                           | 6     |       | L   | -24 | 4   | 56  | 6.76  |       |
| Inferior parietal lobe                                    | 40    | 827   | L   | -46 | -46 | 46  | 7.24  | <.001 |
|                                                           | 40    |       | L   | -36 | -48 | 40  | 6.13  |       |
|                                                           | 40    |       | L   | -26 | -52 | 44  | 5.10  |       |
| <b>0-back &gt; 1-back</b>                                 |       |       |     |     |     |     |       |       |
| Posterior cingulate                                       | 29/30 | 414   | L   | -2  | -50 | 22  | 5.45  | .004  |
|                                                           | 31    |       | L   | -10 | -42 | 36  | 4.29  |       |
|                                                           | 31    |       | R   | 6   | -50 | 32  | 3.94  |       |
| Paracentral lobule                                        | 7     | 242   | L   | -2  | -36 | 54  | 4.79  | .04   |
|                                                           | 5     |       | R   | 8   | -28 | 52  | 4.40  |       |
|                                                           | 5     |       | L   | -2  | -24 | 50  | 4.17  |       |
| <b>0-back &gt; 2-back</b>                                 |       |       |     |     |     |     |       |       |
| Superior temporal gyrus                                   | 22    | 1271  | R   | 60  | -6  | 4   | 10.26 | <.001 |
| Insula                                                    | n/a   |       | R   | 44  | -4  | 14  | 5.42  |       |
| Middle temporal gyrus                                     | 21    |       | R   | 56  | -8  | -16 | 4.78  |       |
| Medial prefrontal gyrus                                   | 10    | 1702  | L   | -4  | 58  | -4  | 8.97  | <.001 |
|                                                           | 9/10  |       | L   | -2  | 50  | 20  | 6.81  |       |
|                                                           | 10/32 |       | L   | -4  | 48  | 10  | 6.66  |       |
| Posterior cingulate                                       | 31    | 3344  | n/a | 0   | -22 | 46  | 8.49  | <.001 |
|                                                           | 30/23 |       | L   | -6  | -52 | 10  | 8.15  |       |
|                                                           | 30/23 |       | L   | -10 | -56 | 4   | 8.10  |       |
| Transverse temporal gyrus                                 | 41    | 613   | L   | -38 | -24 | 10  | 5.91  | .002  |
|                                                           | 41    |       | L   | -54 | -20 | 14  | 4.82  |       |
| Superior temporal gyrus                                   | 22    |       | L   | -58 | -6  | 10  | 4.33  |       |
| <b>Rest &gt; 0-back</b>                                   |       |       |     |     |     |     |       |       |
| Thalamus                                                  | n/a   | 17375 | R   | 26  | -30 | 4   | 10.41 | <.001 |
| Parahippocampal gyrus                                     | 36/37 |       | R   | 30  | -30 | -12 | 9.46  |       |
| Superior-middle temporal gyrus                            | 21/22 |       | R   | 36  | -30 | 4   | 9.04  |       |
| <b>Rest &gt; 1-back</b>                                   |       |       |     |     |     |     |       |       |
| Parahippocampal gyrus<br>(extends to posterior cingulate) | 36    | 18996 | L   | -36 | -30 | -10 | 8.44  | <.001 |
| Transverse temporal gyrus                                 | 41    |       | L   | -22 | -32 | 22  | 8.20  |       |
|                                                           |       | 41    | R   | 28  | -32 | 12  | 8.12  |       |
| Medial prefrontal gyrus                                   | 9     | 653   | L   | -18 | 52  | 22  | 6.16  | .001  |
|                                                           | 9     |       | L   | -4  | 44  | 22  | 4.67  |       |

|                                                            | 9/10  |       | R   | 10  | 54  | 20  | 4.35  |       |
|------------------------------------------------------------|-------|-------|-----|-----|-----|-----|-------|-------|
| <b>Rest &gt; 2-back</b>                                    |       |       |     |     |     |     |       |       |
| Posterior cingulate                                        | 29    | 21550 | L   | -12 | 52  | 2   | 13.06 | <.001 |
| Post-central gyrus                                         | 40    |       | R   | 42  | -16 | 24  | 11.32 |       |
| Parahippocampal gyrus<br>(extends to posterior cingulate)  | 23/31 |       | L   | -10 | -54 | 26  | 10.31 |       |
| Medial prefrontal gyrus                                    | 10    | 1938  | n/a | 0   | 50  | 14  | 6.17  | <.001 |
|                                                            | 9     |       | R   | 10  | 50  | 24  | 6.06  |       |
| AC (Ventral)                                               | 24    |       | n/a | 0   | 28  | 18  | 6.03  |       |
| Middle temporal gyrus                                      | 39    | 390   | L   | -44 | -64 | 28  | 5.86  | .010  |
| Inferior parietal lobe                                     | 40    |       | L   | -46 | -74 | 40  | 5.33  |       |
| <b>Healthy Participants</b>                                |       |       |     |     |     |     |       |       |
| <b>0-back &gt; Rest</b>                                    |       |       |     |     |     |     |       |       |
| Pre-central gyrus                                          | 4     | 10168 | L   | -32 | -24 | 56  | 14.27 | <.001 |
|                                                            | 4     |       | L   | -48 | -18 | 50  | 13.72 |       |
| Medial frontal gyrus                                       | 6     |       | L   | -12 | -8  | 58  | 12.51 |       |
| Inferior parietal lobe                                     | 40    | 2215  | R   | 34  | -52 | 58  | 7.70  | <.001 |
|                                                            | 40    |       | R   | 38  | -44 | 52  | 7.24  |       |
|                                                            | 40    |       | R   | 36  | -42 | 44  | 6.62  |       |
| Putamen                                                    | n/a   | 559   | L   | -20 | 12  | 2   | 6.90  | .004  |
| Caudate/Putamen                                            | n/a   |       | L   | -14 | 6   | 6   | 5.66  |       |
| Putamen                                                    | n/a   |       | L   | -20 | 2   | 10  | 4.95  |       |
| Middle occipital gyrus                                     | 19    | 553   | L   | -42 | -66 | 2   | 6.75  | .004  |
| Middle occipital gyrus                                     | 19    | 654   | R   | 44  | -68 | 2   | 5.72  | .002  |
| Inferior occipital/temporal gyrus                          | 18/19 |       | R   | 54  | -70 | -6  | 5.53  |       |
| Middle occipital gyrus                                     | 19    |       | R   | 44  | -70 | -8  | 5.40  |       |
| Cerebellum                                                 | n/a   | 1111  | R   | 6   | -54 | -18 | 5.62  | <.001 |
|                                                            | n/a   |       | R   | 16  | -52 | -26 | 5.50  |       |
|                                                            | n/a   |       | R   | 26  | -52 | -32 | 5.44  |       |
| <b>1-back &gt; Rest</b>                                    |       |       |     |     |     |     |       |       |
| Middle frontal gyrus                                       | 6     | 15985 | L   | -4  | 2   | 54  | 17.19 | <.001 |
| Pre-central gyrus                                          | 4     |       | L   | -34 | -22 | 56  | 14.77 |       |
|                                                            | 4     |       | L   | -44 | -16 | 56  | 14.70 |       |
| Inferior parietal lobe                                     | 40    | 9632  | R   | 40  | -44 | 50  | 9.56  | <.001 |
|                                                            | 40    |       | R   | 38  | -36 | 40  | 9.37  |       |
| Precuneus                                                  | 7     |       | R   | 14  | -62 | 54  | 9.19  |       |
| Middle frontal gyrus (DLPFC)                               | 46    | 834   | R   | 38  | 38  | 30  | 8.56  | .001  |
| Putamen                                                    | n/a   | 344   | R   | 18  | 2   | 8   | 7.32  | .034  |
| Middle frontal gyrus (DLPFC)                               | 46    | 377   | L   | -42 | 36  | 30  | 6.40  | .025  |
| <b>2-back &gt; Rest</b>                                    |       |       |     |     |     |     |       |       |
| Medial frontal gyrus/AC (to superior-middle frontal gyrus) | 6     | 26041 | L   | -6  | 4   | 54  | 14.42 | <.001 |
| Inferior parietal lobe                                     | 40    |       | R   | 40  | -42 | 42  | 14.25 |       |
|                                                            | 40    |       | L   | -46 | -40 | 46  | 14.11 |       |
| Cerebellum                                                 | n/a   | 1888  | R   | 4   | -56 | -20 | 9.18  | <.001 |
|                                                            |       |       | L   | -24 | -62 | -34 | 6.88  |       |

|                                       |       |       |   |     |     |     |       |       |
|---------------------------------------|-------|-------|---|-----|-----|-----|-------|-------|
|                                       |       |       | R | 26  | -52 | -34 | 5.76  |       |
| Inferior frontal gyrus/Insula         | 45    | 1005  | L | -32 | 22  | 0   | 7.79  | <.001 |
| Thalamus                              | n/a   |       | L | -14 | -8  | 12  | 6.69  |       |
| Middle frontal gyrus (DLPFC)          | 9     | 526   | L | -38 | 32  | 34  | 6.87  | .007  |
| Putamen                               | n/a   | 333   | R | 18  | 0   | 10  | 6.57  | .038  |
| Inferior frontal gyrus/Insula         | 47    | 448   | R | 36  | 20  | -2  | 6.25  | .013  |
|                                       | 47    |       | R | 24  | 26  | 2   | 6.04  |       |
| <b>1-back &gt; 0-back</b>             |       |       |   |     |     |     |       |       |
| Superior parietal lobe                | 7     | 10194 | R | 14  | -68 | 58  | 8.92  | <.001 |
| Superior occipital gyrus              | 19    |       | R | 34  | -78 | 30  | 7.41  |       |
| Middle temporal lobe                  | 21    |       | R | 60  | -48 | -10 | 7.36  |       |
| Medial frontal gyrus/AC               | 6     | 1680  | R | 2   | 12  | 52  | 7.46  | <.001 |
| Superior-middle frontal gyrus         | 8     |       | R | 30  | 8   | 56  | 6.50  |       |
|                                       | 6     |       | R | 38  | 2   | 54  | 6.43  |       |
| Middle frontal gyrus (includes DLPFC) | 8     | 1166  | R | 36  | 36  | 46  | 7.35  | <.001 |
|                                       | 9     |       | R | 44  | 40  | 36  | 5.80  |       |
|                                       | 10/46 |       | R | 36  | 52  | 14  | 5.52  |       |
| Middle frontal gyrus                  | 8     | 862   | L | -44 | -2  | 50  | 6.78  | <.001 |
| Inferior frontal gyrus                | 44    |       | L | -46 | 8   | 26  | 5.48  |       |
| Middle frontal gyrus (includes DLPFC) | 46    | 399   | L | -46 | 38  | 28  | 6.15  | .015  |
|                                       | 9     |       | L | -42 | 32  | 38  | 6.01  |       |
| <b>2-back &gt; 0-back</b>             |       |       |   |     |     |     |       |       |
| Precuneus                             | 7     | 12114 | L | -10 | -62 | 56  | 13.22 | <.001 |
| Inferior parietal lobe                | 7     |       | R | 30  | -70 | 46  | 12.58 |       |
| Superior parietal lobe                | 7     |       | R | 14  | -68 | 56  | 11.83 |       |
| Middle frontal gyrus (includes DLPFC) | 8     | 3768  | R | 26  | 12  | 54  | 9.24  | <.001 |
|                                       | 8     |       | R | 34  | 32  | 48  | 9.03  |       |
|                                       | 9     |       | R | 42  | 6   | 46  | 8.78  |       |
| Middle frontal gyrus (DLPFC)          | 9     | 426   | L | -42 | 32  | 38  | 6.77  | .016  |
| Middle frontal gyrus                  | 8     | 823   | L | -38 | 0   | 52  | 6.49  | .001  |
| AC                                    | 32/6  |       | L | -26 | 6   | 50  | 5.05  |       |
| Inferior frontal gyrus                | 44    |       | L | -44 | 6   | 26  | 4.56  |       |
| Insula                                | n/a   | 322   | R | 36  | 18  | -4  | 6.27  | .043  |
|                                       |       |       | R | 26  | 26  | -2  | 4.89  |       |
| <b>0-back &gt; 1-back</b>             |       |       |   |     |     |     |       |       |
| Posterior cingulate                   | 23/31 | 2596  | L | -8  | -50 | 22  | 9.94  | <.001 |
|                                       | 31/24 |       | R | 2   | -16 | 44  | 6.72  |       |
| Medial prefrontal gyrus               | 9     | 3664  | L | -6  | 60  | 14  | 9.22  | <.001 |
|                                       | 9     |       | L | -10 | 56  | 34  | 6.53  |       |
|                                       | 9     |       | R | 10  | 56  | 34  | 6.21  |       |
| Middle-inferior temporal gyrus        | 21    | 412   | R | 44  | -10 | -10 | 5.52  | .013  |
|                                       | 21/20 |       | R | 40  | -12 | -26 | 3.80  |       |
| <b>0-back &gt; 2-back</b>             |       |       |   |     |     |     |       |       |
| Medial prefrontal gyrus               | 9     | 3374  | L | -10 | 58  | 30  | 10.36 | <.001 |
|                                       | 10    |       | L | -8  | 58  | 16  | 8.50  |       |
|                                       | 10    |       | L | -4  | 50  | -4  | 7.28  |       |
| Posterior cingulate                   | 29/30 | 4867  | L | -6  | -48 | 22  | 9.49  | <.001 |
| Paracentral lobule                    | 5     |       | R | 2   | -22 | 54  | 8.74  |       |
| Posterior cingulate                   | 29/30 |       | R | 8   | -50 | 18  | 7.29  |       |
| Post-central gyrus                    | 43    | 1592  | R | 38  | -16 | 18  | 6.82  | <.001 |
| Insula                                | n/a   |       | R | 36  | -16 | 8   | 5.95  |       |

|                                       |       |       |   |     |      |     |       |       |
|---------------------------------------|-------|-------|---|-----|------|-----|-------|-------|
| Pre-central gyrus                     | 6     |       | R | 64  | -2   | 14  | 5.71  |       |
| Post-central gyrus                    | 43    | 817   | L | -40 | -16  | 16  | 6.76  | .001  |
| Parahippocampal gyrus                 | 36    |       | L | -28 | -26  | -24 | 4.67  |       |
| Insula/Middle temporal gyrus          | 21    |       | L | -32 | -18  | 0   | 4.22  |       |
| <b>Rest &gt; 0-back</b>               |       |       |   |     |      |     |       |       |
| Hippocampus/<br>Parahippocampal gyrus | n/a   | 1117  | R | 20  | -32  | -4  | 8.29  | <.001 |
| Posterior cingulate                   | 29    |       | R | 8   | -46  | 6   | 4.97  |       |
|                                       | 29/30 |       | L | -6  | -48  | 10  | 4.27  |       |
| Precuneus                             | 7     | 847   | R | 8   | -82  | 40  | 7.68  | <.001 |
|                                       | 7     |       | R | 14  | -90  | 42  | 6.97  |       |
|                                       | 19    |       | L | -10 | -92  | 38  | 6.08  |       |
| Insula                                | n/a   | 442   | R | 38  | -14  | 12  | 6.75  | .011  |
| Superior-middle temporal gyrus        | 22/21 |       | R | 38  | -4   | -8  | 3.94  |       |
| Lingual gyrus                         | 18    | 510   | L | -24 | -88  | -14 | 6.30  | .006  |
| Lingual gyrus/Cuneus                  | 17    |       | L | -20 | -100 | -6  | 5.62  |       |
| Fusiform gyrus                        | 18    |       | L | -32 | -82  | -24 | 5.23  |       |
| Lingual gyrus                         | 18    | 318   | R | 2   | -80  | -4  | 5.77  | .036  |
| Fusiform gyrus                        | 18/19 | 335   | R | 26  | -82  | -20 | 5.64  | .030  |
| Lingual/Inferior occipital gyrus      | 17/18 |       | R | 24  | -92  | -14 | 5.53  |       |
| Cuneus/Inferior occipital gyrus       | 17/18 |       | R | 24  | -98  | -6  | 5.04  |       |
| Precuneus                             | 7     | 586   | R | 2   | -38  | 46  | 5.64  | .003  |
| Posterior cingulate                   | 31    |       | R | 14  | -48  | 38  | 4.91  |       |
| Middle temporal gyrus                 | 21    | 366   | L | -46 | -6   | -16 | 5.02  | .022  |
|                                       | 21    |       | L | -50 | 0    | -30 | 4.52  |       |
|                                       | 21    |       | L | -40 | -14  | -4  | 4.46  |       |
| <b>Rest &gt; 1-back</b>               |       |       |   |     |      |     |       |       |
| Posterior cingulate                   | 23/30 | 12903 | L | -6  | -58  | 20  | 10.82 | <.001 |
| Middle temporal gyrus                 | 21    |       | R | 42  | -10  | -16 | 10.02 |       |
| Insula                                | n/a   |       | R | 40  | -16  | 12  | 8.90  |       |
| Medial prefrontal gyrus               | 9     | 3811  | L | -12 | 54   | 34  | 9.20  | <.001 |
|                                       | 9     |       | L | -10 | 46   | 36  | 8.54  |       |
|                                       | 9/10  |       | R | 10  | 58   | 24  | 7.59  |       |
| Fusiform gyrus                        | 18    | 535   | L | -32 | -82  | -24 | 6.67  | .006  |
| Lingual gyrus                         | 18    |       | L | -24 | -88  | -14 | 5.97  |       |
| Middle occipital gyrus                | 18/19 |       | L | -20 | -98  | 10  | 5.61  |       |
| <b>Rest &gt; 2-back</b>               |       |       |   |     |      |     |       |       |
| Posterior cingulate                   | 31    | 9078  | L | -8  | -50  | 30  | 23.03 | <.001 |
|                                       | 23/31 |       | R | 8   | -52  | 24  | 14.13 |       |
|                                       | 31    |       | R | 2   | -20  | 40  | 9.85  |       |
| Insula                                | n/a   | 4030  | R | 38  | -14  | 10  | 13.11 | <.001 |
| Medial temporal lobe/Amygdala         | 28    |       | R | 28  | 6    | -26 | 5.46  |       |
| Parahippocampal gyrus                 | 35/36 |       | R | 34  | -14  | -30 | 4.98  |       |
| Medial prefrontal gyrus               | 9     | 3162  | L | -12 | 56   | 32  | 9.89  | <.001 |
|                                       | 10    |       | L | -2  | 58   | 8   | 9.04  |       |
|                                       | 10    |       | L | -2  | 54   | 16  | 8.93  |       |
| Angular gyrus                         | 39    | 342   | L | -56 | -66  | 34  | 7.06  | .035  |
| Middle temporal gyrus                 | 39    |       | L | -54 | -72  | 26  | 6.60  |       |
| Occipital gyrus                       | 18    | 410   | L | -22 | -100 | -4  | 6.70  | .018  |

Kumari *et al.*

|                           |    |     |   |     |      |     |      |       |
|---------------------------|----|-----|---|-----|------|-----|------|-------|
| Middle occipital gyrus    | 18 |     | L | -26 | -100 | 4   | 5.57 |       |
| Fusiform gyrus            | 18 |     | L | -32 | -82  | -24 | 5.24 |       |
| Middle temporal gyrus     | 21 | 885 | L | -40 | -16  | -6  | 6.51 | <.001 |
| Transverse temporal gyrus | 41 |     | L | -40 | -16  | 16  | 6.46 |       |

BA, Brodmann area; MNI, Montreal Neurological Institute; AC, anterior cingulate; DLPFC, dorsolateral prefrontal cortex.

**Supplemental Table 2.** Brain regions with significantly co-varying increases or decreases in activity (height threshold  $p = .005$ ) in the left dorsolateral prefrontal cortex during the 2-back' (<0-back) condition in patients (CBT+TAU) and healthy participants.

| Patients                                                     | BA    | Cluster size<br>(voxels) | Side | MNI Coordinates |     |    | Voxel<br>T value | Cluster $p$<br>(corrected) |
|--------------------------------------------------------------|-------|--------------------------|------|-----------------|-----|----|------------------|----------------------------|
|                                                              |       |                          |      | X               | Y   | Z  |                  |                            |
| <b>Regions with Positively Correlated Activity</b>           |       |                          |      |                 |     |    |                  |                            |
| Middle frontal gyrus (extends to include AC and right DLPFC) | 46    | 19066                    | L    | -48             | 34  | 28 | 19.55            | <.001                      |
|                                                              | 46    |                          | L    | -44             | 48  | 8  | 10.52            |                            |
|                                                              | 10/46 |                          | L    | -48             | 44  | 16 | 8.85             |                            |
| Inferior parietal cortex                                     | 40    | 1144                     | L    | -54             | -46 | 54 | 4.54             | .027                       |
|                                                              | 40    |                          | L    | -58             | -54 | 42 | 4.14             |                            |
|                                                              | 40    |                          | L    | -34             | -50 | 48 | 3.87             |                            |
| <b>Regions with Negatively Correlated Activity</b>           |       |                          |      |                 |     |    |                  |                            |
| Posterior cingulate                                          | 29/30 | 574                      | R    | 2               | -46 | 20 | 5.31             | 0.22<br>(uncorrected .02)  |
|                                                              | 23/30 |                          | R    | 6               | -56 | 10 | 2.98             |                            |
| <b>Healthy Participants</b>                                  |       |                          |      |                 |     |    |                  |                            |
| <b>Regions with Positively Correlated Activity</b>           |       |                          |      |                 |     |    |                  |                            |
| Middle frontal gyrus (extends to include AC and right DLPFC) | 46    | 20441                    | L    | -48             | 34  | 32 | 21.75            | <.001                      |
|                                                              | 10    |                          | L    | -36             | 52  | 26 | 14.63            |                            |
|                                                              | 46    |                          | R    | 42              | 35  | 34 | 13.76            |                            |
| Inferior-superior parietal cortex                            | 7     | 1144                     | R    | 32              | -84 | 40 | 10.27            | <.001                      |
|                                                              | 7     |                          | L    | -38             | -70 | 50 | 8.76             |                            |
|                                                              | 7     |                          | L    | -30             | -86 | 28 | 8.31             |                            |
| <b>Regions with Negatively Correlated Activity</b>           |       |                          |      |                 |     |    |                  |                            |
| Posterior cingulate                                          | 23/31 | 4071                     | R    | 4               | -50 | 24 | 5.95             | <.001                      |
|                                                              | 23/30 |                          | L    | -14             | -56 | 10 | 5.72             |                            |
|                                                              | 23/31 |                          | L    | -8              | -62 | 8  | 4.43             |                            |

BA, Brodmann Area; MNI, Montreal Neurological Institute; AC, anterior cingulate; DLPFC, dorsolateral prefrontal cortex.

**Supplemental Table 3.** Brain regions with significantly co-varying increases or decreases in activity (height threshold  $p = .005$ ) in the right dorsolateral prefrontal cortex during the 2-back' (<0-back) condition in patients (CBT+TAU) and healthy participants.

| Patients                                                                              | BA    | Cluster size (voxels) | Side | MNI Coordinates |     |     | Voxel T value | Cluster $p$ (corrected) |
|---------------------------------------------------------------------------------------|-------|-----------------------|------|-----------------|-----|-----|---------------|-------------------------|
|                                                                                       |       |                       |      | X               | Y   | Z   |               |                         |
| <b>Regions with Positively Correlated Activity</b>                                    |       |                       |      |                 |     |     |               |                         |
| Middle-inferior frontal gyrus (extends to include AC and left DLPFC)                  | 45/46 | 35481                 | R    | 54              | 24  | 22  | 12.41         | <.001                   |
|                                                                                       | 44    |                       | R    | 46              | 8   | 34  | 8.43          |                         |
|                                                                                       | 45/44 |                       | R    | 46              | 44  | 2   | 7.96          |                         |
| <b>Regions with Negatively Correlated Activity</b>                                    |       |                       |      |                 |     |     |               |                         |
| None even at uncorrected level                                                        |       |                       |      |                 |     |     |               |                         |
| <b>Healthy Participants</b>                                                           |       |                       |      |                 |     |     |               |                         |
| <b>Regions with Positively Correlated Activity</b>                                    |       |                       |      |                 |     |     |               |                         |
| Middle frontal gyrus (extends to include AC and superior parietal cortex bilaterally) | 45/46 | 40347                 | R    | 50              | 22  | 20  | 17.22         | <.001                   |
|                                                                                       | 44    |                       | L    | -40             | 6   | 34  | 10.83         |                         |
|                                                                                       | 9     |                       | L    | -42             | 14  | 34  | 10.52         |                         |
| <b>Regions with Negatively Correlated Activity</b>                                    |       |                       |      |                 |     |     |               |                         |
| Fusiform gyrus (extends to parahippocampal gyrus)                                     | 37    | 3676                  | R    | 14              | -56 | -16 | 5.31          | <.001                   |
| Posterior cingulate                                                                   | 29/30 |                       | L    | -4              | -56 | 4   | 4.58          |                         |

BA, Brodmann area; MNI, Montreal Neurological Institute; AC, anterior cingulate; DLPFC, dorsolateral prefrontal cortex.
